# Supplementary material for: Enhancing the tumor penetration of multiarm polymers by collagenase modification
Source: Royal Society of Chemistry journal article supplement (doi:10.1039/d3bm02123h), 2024-01-01
Supplement: d3bm02123h1.pdf [file d3bm02123h1.pdf]

Electronic Supplementary Material (ESI) for Biomaterials Science. This journal is  
© The Royal Society of Chemistry 2023

## Electronic Supplementary Information

### Enhancing the tumor penetration of multiarm polymers by collagenase modification

Bo Yu,<sup>a</sup> Weijie Wang,<sup>a</sup> Yongmin Zhang,<sup>a</sup> Ying Sun,<sup>a</sup> Cheng Li,<sup>a</sup> Qian Liu,<sup>b</sup> Xu Zhen,<sup>\*a</sup> Xiqun Jiang<sup>\*a</sup> and Wei Wu<sup>\*a</sup>

<sup>a</sup>Department of Polymer Science & Engineering, State Key Laboratory of Analytical Chemistry for Life Science, College of Chemistry & Chemical Engineering, Nanjing University, Nanjing 210023, P. R. China.

<sup>b</sup>Department of Urology, Tianjin First Central Hospital, Tianjin 300192, China.

\* To whom correspondence should be addressed.

E-mail: [zhenxu@nju.edu.cn](mailto:zhenxu@nju.edu.cn), [jiangx@nju.edu.cn](mailto:jiangx@nju.edu.cn), [wuwei@nju.edu.cn](mailto:wuwei@nju.edu.cn)

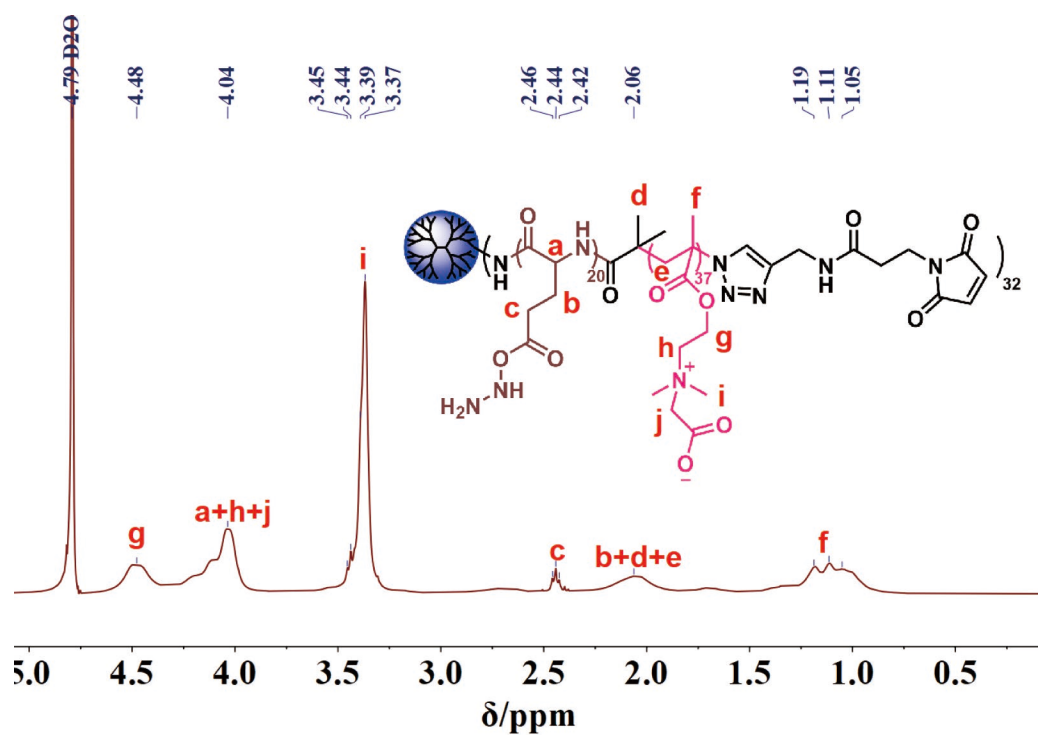

Fig. S1  $^1\text{H}$  NMR spectrum of DPMal in  $\text{D}_2\text{O}$ .

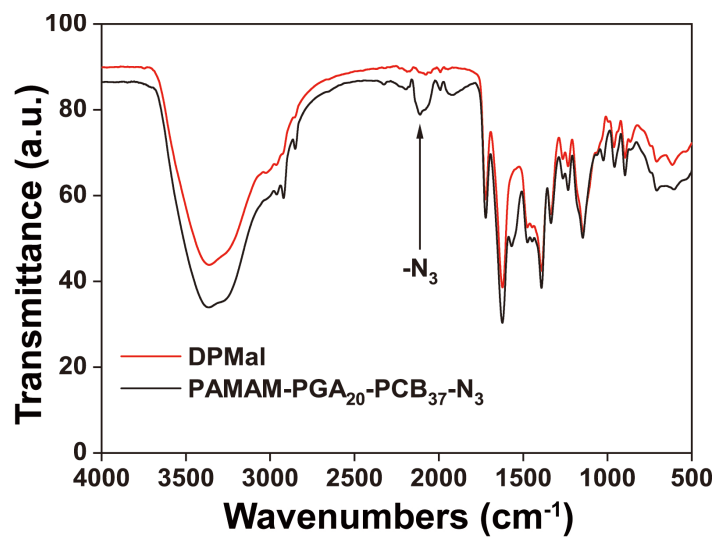

Fig. S2 FTIR spectra of DPMal and PAMAM-PGA<sub>20</sub>-PCB<sub>37</sub>-N<sub>3</sub>.

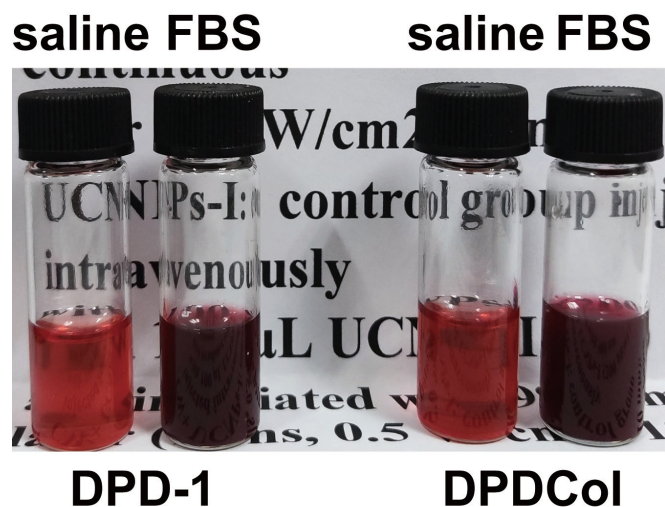

**Fig. S3** Photographs of the saline and FBS solutions of DPD-1 and DPDCol at the concentrations normalized to 0.3 mg/mL DOX equivalent.

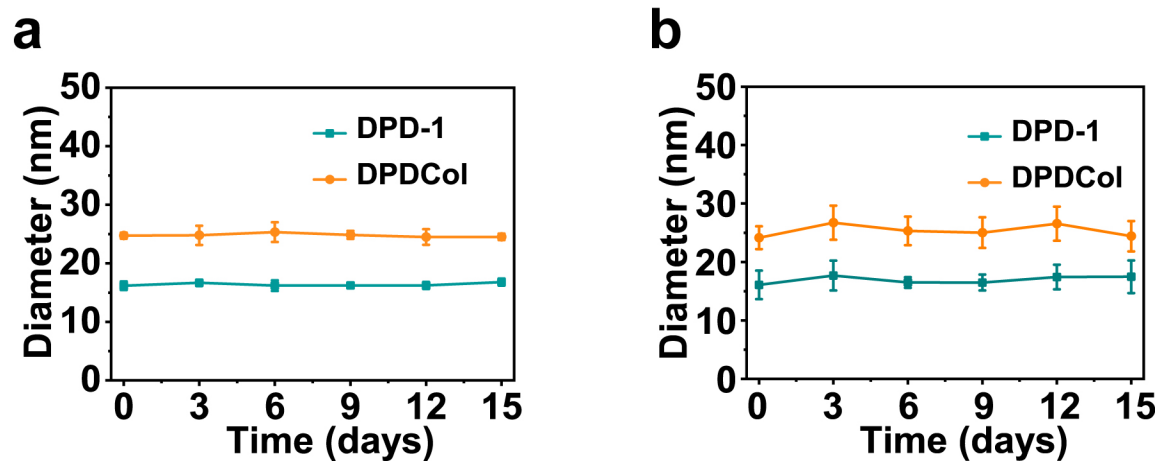

**Fig. S4** The hydrodynamic diameter of DPD-1 and DPDCol after different days of storage in PBS (a) and cell culture medium (b).

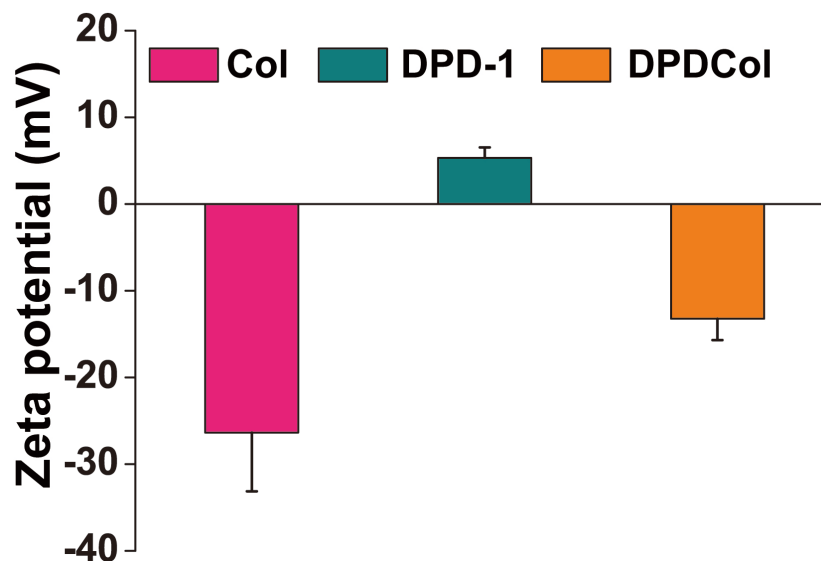

Fig. S5 Zeta potential of Col, DPD-1 and DPDCol in PBS (pH = 7.4) (n=5, mean  $\pm$  SD).

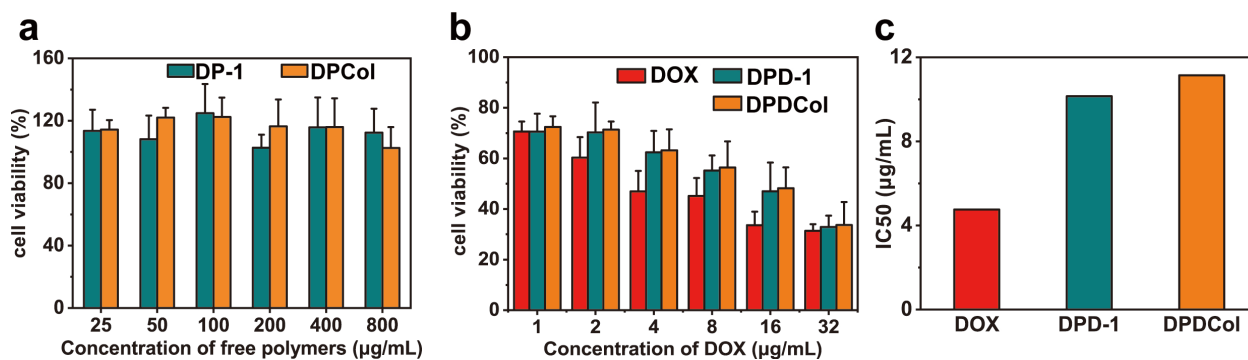

Fig. S6 (a) In vitro cytotoxicities of DP-1 and DPCol against CT26 cells after 48 h of incubation. (b) In vitro cytotoxicities of DOX, DPD-1, and DPDCol against CT26 cells after 24 h of incubation. Data represent mean  $\pm$  SD (n = 3). (c) IC50 values calculated from the MTT assay data.

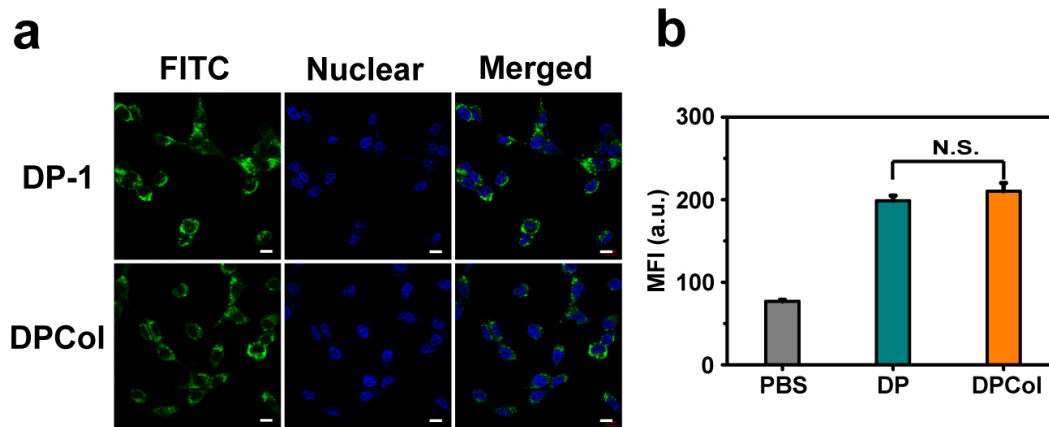

**Fig. S7** Typical CLSM images (a) and mean fluorescence intensities measured by flow cytometry (b) of the CT26 cells after incubated with the FITC-labeled DP-1 and DPCol at 37°C for 4 h, respectively. Scale bars = 10  $\mu$ m. Data represent mean  $\pm$  SD (n = 3). N.S. means no significant difference.

**Table S1** Maximal DOX Concentrations and Corresponding Appearance Time in the Tumors and Main Organs (DPD-1 versus DPDCol).

| DPD-1<br>versus DPD-2                 | Heart      | Liver        | Spleen       | Lung       | Kidney       | Tumor      |
|---------------------------------------|------------|--------------|--------------|------------|--------------|------------|
| Maximal DOX<br>concentration (% ID/g) | 6.7<br>7.5 | 18.5<br>25.4 | 15.2<br>19.6 | 8.9<br>8.1 | 27.6<br>13.1 | 3.6<br>4.6 |
| Appearance time (h)                   | 4<br>4     | 4<br>4       | 8<br>4       | 1<br>4     | 1<br>4       | 4<br>4     |

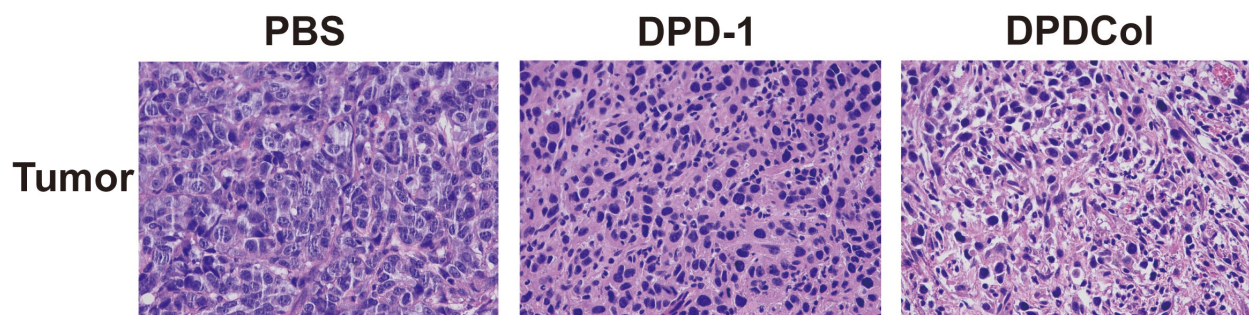

**Fig. S8** H&E-stained tumor slices from 4T1 tumor-bearing BALB/c mice on the 7<sup>th</sup> day after treatment with PBS, DPD-1, and DPDCol. The images were taken at 400 $\times$  magnification.

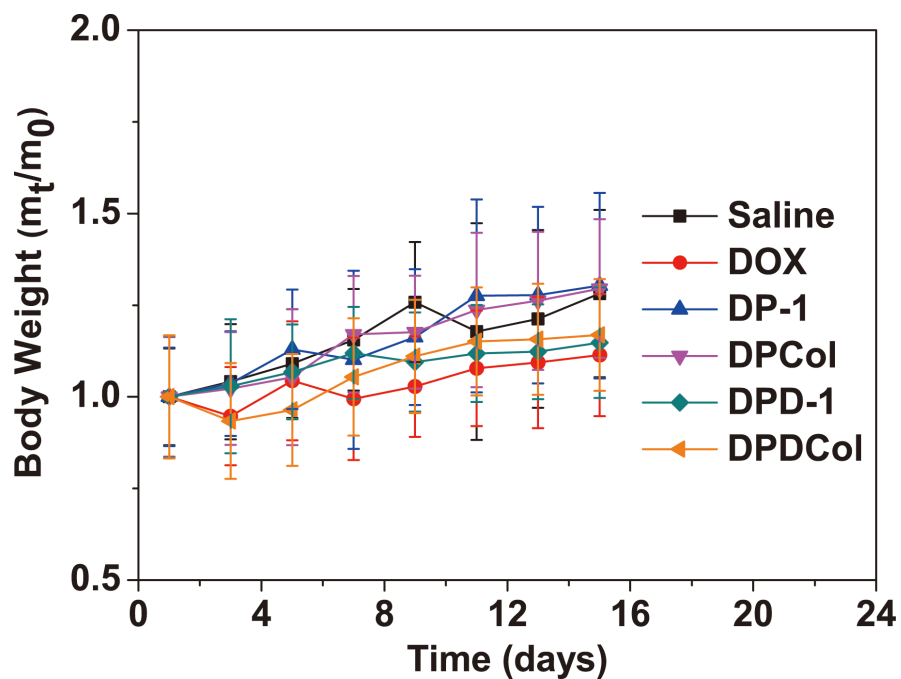

**Fig. S9** Evolution of the body weights of the 4T1 tumor-bearing mice after the different treatments, expressed as the ratio of the measured body weight to the initial body weight. Data are presented as mean  $\pm$  SD (n = 10).

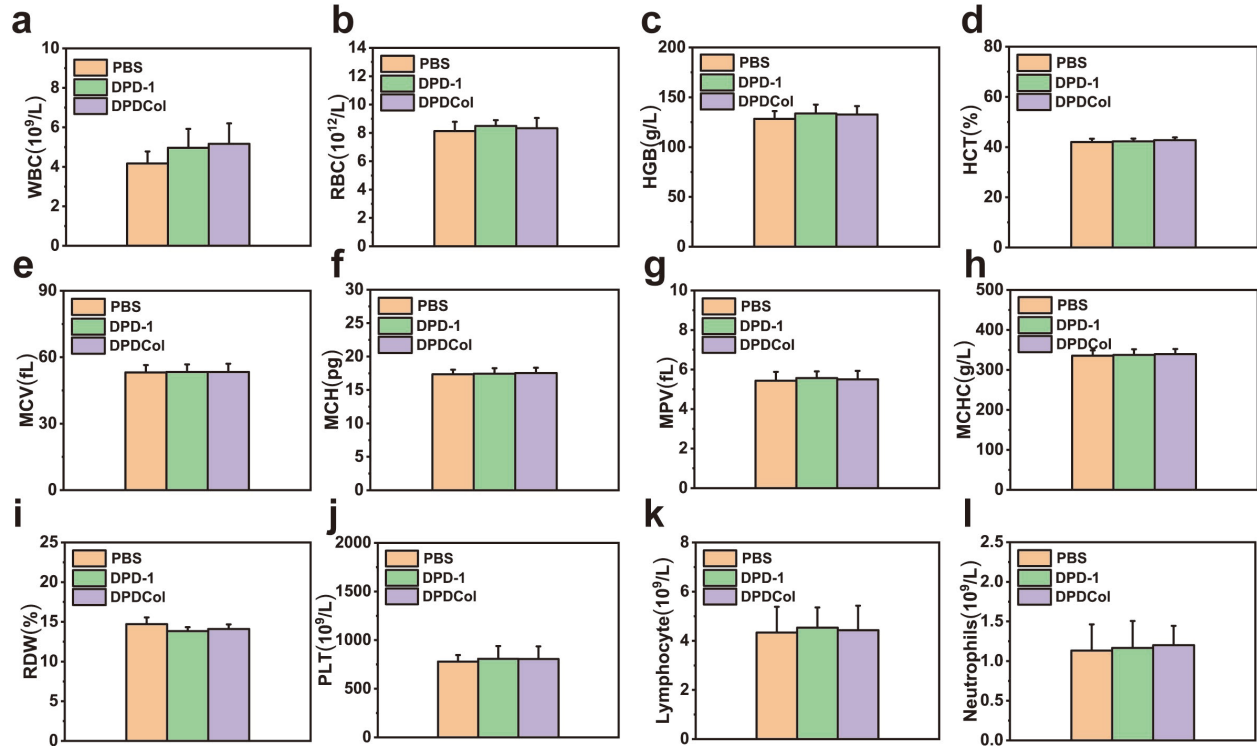

**Fig. S10** Hematology analysis of the mice after tail-vein injection of DPD-1 and DPDCol. Data are presented as mean  $\pm$  SD (n=3).

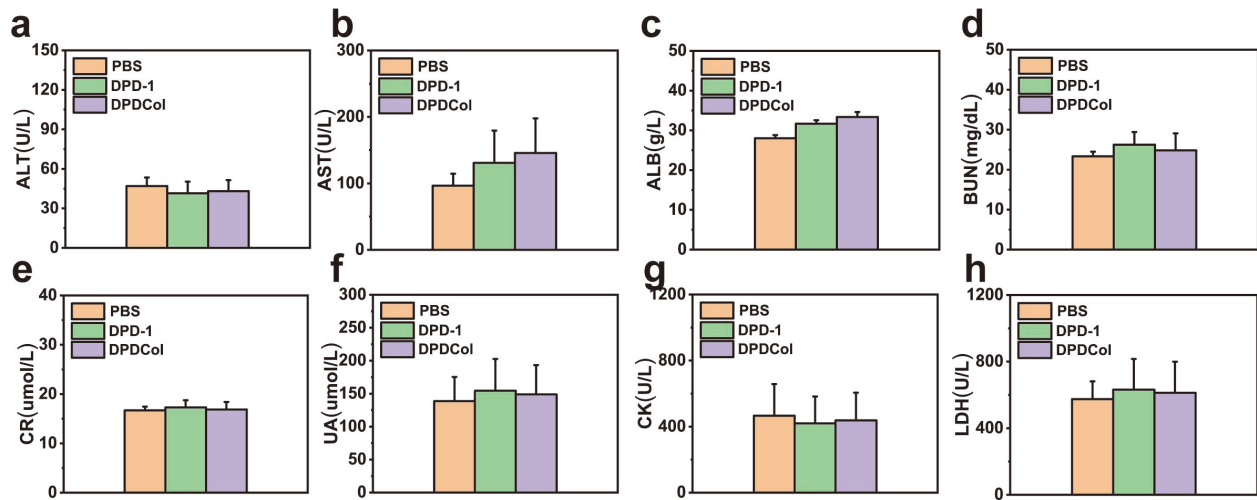

**Fig. S11** Blood chemistry analysis of the mice after tail-vein injection of DPD-1 and DPDCol. Data are presented as mean  $\pm$  SD (n=3).
